# Supplementary material
Source: Springer Nature journal article supplement (https://www.springermedizin.de/resource/supplementary/12943_2012_1020_MOESM4_ESM.pdf/9552142)

**A.**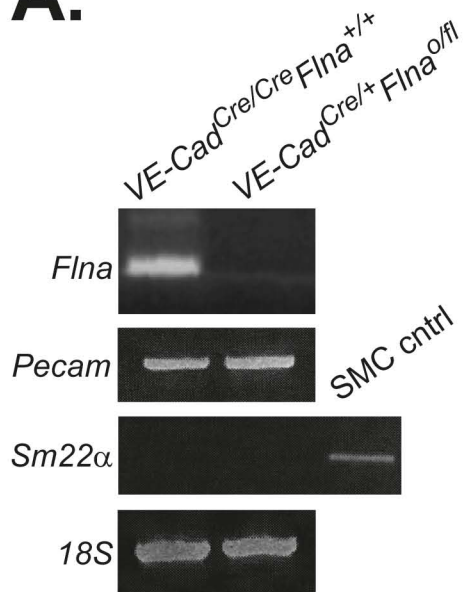**B.**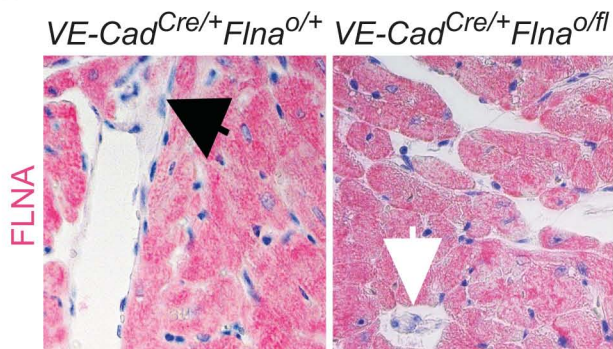**C.**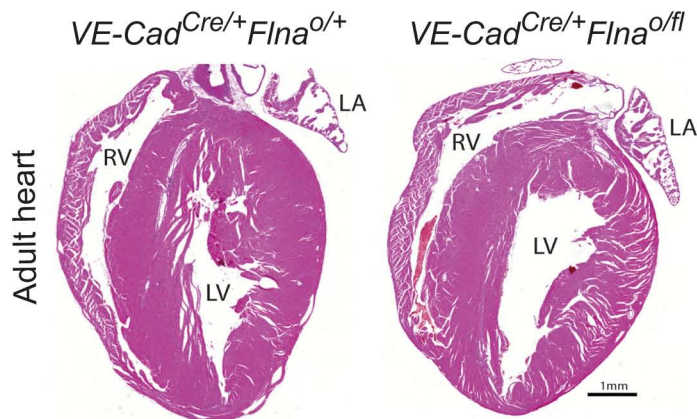**D.**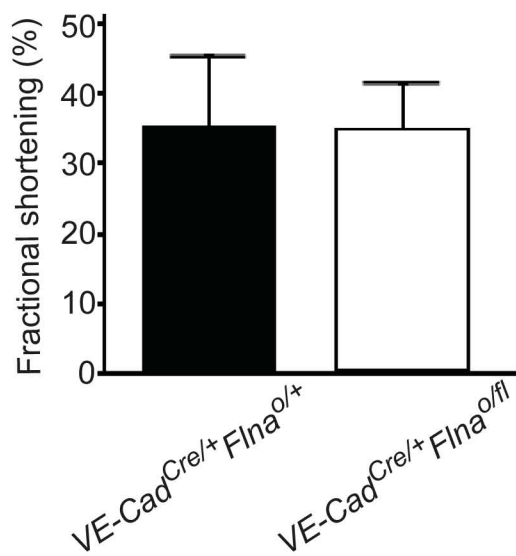

Supplement: MOESM4 [file 9552142]
